# Supplementary material
Source: HighWire-hosted journal article supplement (https://thorax.bmj.com/content/75/5/422)
Supplement: inline-supplementary-material-1 [file inline-supplementary-material-1.pdf]

1 Supplementary Table 1. Comparison of baseline characteristics between respondents and non-respondents in the follow-up study.

| Baseline characteristics       | Participated or not |           |                 |           |           |           |                     |           |
|--------------------------------|---------------------|-----------|-----------------|-----------|-----------|-----------|---------------------|-----------|
|                                | Normal              |           | Primary snoring |           | Mild OSA  |           | Moderate/severe OSA |           |
|                                | No=152              | Yes=98    | No=54           | Yes=49    | No=124    | Yes=75    | No=46               | Yes=21    |
| Male, %                        | 56%                 | 52%       | 69%             | 59%       | 73%       | 68%       | 78%                 | 76%       |
| Age, years                     | 10.1±1.8            | 9.9±1.8   | 9.5±1.8         | 9.3±1.8   | 10.4±1.8  | 9.9±1.8   | 9.8±1.7             | 9.7±1.9   |
| BMI z-score, kg/m <sup>2</sup> | 0.28±1.16           | 0.30±1.03 | 0.69±0.96       | 0.49±0.85 | 0.69±1.12 | 0.65±1.00 | 1.08±0.96           | 0.80±1.12 |
| Overweight/obese, %            | 28%                 | 27%       | 37%             | 29%       | 44%       | 36%       | 63%                 | 48%       |
| Prepubertal, %                 | 81%                 | 85%       | 85%             | 96%       | 81%       | 87%       | 91%                 | 90%       |
| Allergic rhinitis, %           | 66%                 | 72%       | 81%             | 86%       | 68%       | 81%       | 61%                 | 62%       |
| Asthma, %                      | 7%                  | 11%       | 6%              | 15%       | 11%       | 12%       | 9%                  | 10%       |
| Father's education, %          |                     |           |                 |           |           |           |                     |           |
| Primary or below               | 14%                 | 9%        | 8%              | 10%       | 18%       | 19%       | 9%                  | 5%        |
| Secondary                      | 73%                 | 73%       | 77%             | 63%       | 57%       | 63%       | 59%                 | 76%       |
| Tertiary or above              | 13%                 | 18%       | 15%             | 27%       | 25%       | 18%       | 32%                 | 19%       |
| Mother's education, %          |                     |           |                 |           |           |           |                     |           |
| Primary or below               | 17%                 | 7%        | 13%             | 12%       | 18%       | 13%       | 4%                  | 5%        |
| Secondary                      | 75%                 | 82%       | 79%             | 69%       | 66%       | 72%       | 82%                 | 90%       |
| Tertiary or above              | 8%                  | 11%       | 8%              | 18%       | 16%       | 15%       | 13%                 | 5%        |
| Monthly household income, %    |                     |           |                 |           |           |           |                     |           |
| HKD 10,000 or below            | 29%                 | 17%       | 17%             | 16%       | 28%       | 20%       | 20%                 | 19%       |
| HKD 10,001 – 15,000            | 21%                 | 19%       | 30%             | 18%       | 18%       | 17%       | 16%                 | 19%       |
| HKD 15,001 or above            | 49%                 | 63%       | 53%             | 65%       | 54%       | 63%       | 64%                 | 62%       |
| Habitual snoring, %            | 0%                  | 0%        | 100%            | 100%      | 34%       | 31%       | 37%                 | 43%       |

|                                 |                |                |                |                |                  |                  |                   |                   |
|---------------------------------|----------------|----------------|----------------|----------------|------------------|------------------|-------------------|-------------------|
| Mouth breathing during sleep, % | 41%            | 42%            | 56%            | 59%            | 48%              | 49%              | 54%               | 62%               |
| Tonsils $\geq$ grade II, %      | 45%            | 37%            | 61%            | 51%            | 53%              | 52%              | 70%               | 75%               |
| Adenoid $\geq$ grade II, %      | 37%            | 33%            | 35%            | 29%            | 48%              | 35%              | 54%               | 42%               |
| OAHl, events/h                  | 0.2<br>(0–0.5) | 0.1<br>(0–0.4) | 0.1<br>(0–0.5) | 0.2<br>(0–0.5) | 2.1<br>(1.4–2.8) | 1.9<br>(1.2–2.8) | 8.2<br>(6.7–12.4) | 7.5<br>(5.8–10.3) |

BMI: body mass index; OAHl: obstructive apnea hypopnea index

2  
3  
4

5 Supplementary table 2. Characteristics at baseline and 10-year follow-up by OSA categories at follow-up.

| Subject characteristics                   | OSA categories at follow-up (n=243) |                               |                        |                                     | P for trend |
|-------------------------------------------|-------------------------------------|-------------------------------|------------------------|-------------------------------------|-------------|
|                                           | Normal<br>n=155 (64%)               | Primary snoring<br>n=28 (12%) | Mild OSA<br>n=40 (16%) | Moderate-to-severe OSA<br>n=20 (8%) |             |
| Male, %                                   | 57%                                 | 50%                           | 68%                    | 90%*                                | 0.009       |
| Age, years                                |                                     |                               |                        |                                     |             |
| Baseline                                  | 9.6 ± 1.8                           | 9.9 ± 1.9                     | 10.2 ± 2.0             | 9.7 ± 1.3                           | 0.23        |
| Follow-up                                 | 20.1 ± 2.0                          | 20.4 ± 2.0                    | 20.4 ± 1.9             | 20.0 ± 1.6                          | 0.55        |
| Follow-up length, years                   | 10.4 ± 1.1                          | 10.6 ± 1.0                    | 10.2 ± 1.2             | 10.3 ± 1.0                          | 0.37        |
| Prepubertal at baseline, %                | 88%                                 | 86%                           | 88%                    | 95%                                 | 0.55        |
| BMI z-score, kg/m <sup>2</sup>            |                                     |                               |                        |                                     |             |
| Baseline                                  | 0.38 ± 1.01                         | 0.36 ± 0.94                   | 0.78 ± 1.01            | 0.91 ± 0.79                         | 0.005       |
| Follow-up                                 | 0.13 ± 1.04                         | 0.28 ± 1.14                   | 0.47 ± 0.96            | 1.09 ± 1.00*                        | <0.001      |
| Overweight, %                             |                                     |                               |                        |                                     |             |
| Baseline                                  | 28%                                 | 21%                           | 40%                    | 55%*                                | 0.016       |
| Follow-up                                 | 15%                                 | 21%                           | 23%                    | 65%*                                | <0.001      |
| Habitual snoring, %                       |                                     |                               |                        |                                     |             |
| Baseline                                  | 26%                                 | 50%*                          | 45%                    | 40%                                 | 0.016       |
| Follow-up                                 | 0%                                  | 100%*                         | 40%*                   | 45%*                                | <0.001      |
| Mouth breathing during sleep, %           |                                     |                               |                        |                                     |             |
| Baseline                                  | 48%                                 | 57%                           | 50%                    | 50%                                 | 0.70        |
| Follow-up                                 | 30%                                 | 75%*                          | 43%                    | 58%*                                | 0.004       |
| OAH, events/h <sup>#</sup>                |                                     |                               |                        |                                     |             |
| Baseline                                  | 0.3 (0–1.3)                         | 0.8 (0.2–1.7)                 | 1.1 (0.3–4.8)*         | 0.9 (0.3–3.0)                       | <0.001      |
| Follow-up                                 | 0.6 (0–1.9)                         | 0.9 (0.1–2.5)                 | 7.5 (5.6–10.0)*        | 20.2 (18.2–25.4)*                   | <0.001      |
| <b>Baseline ambulatory BP<sup>b</sup></b> |                                     |                               |                        |                                     |             |
| SBP                                       |                                     |                               |                        |                                     |             |
| Daytime, mmHg                             | 112 ± 9                             | 111 ± 7                       | 114 ± 8                | 116 ± 9*                            | 0.028       |
| Nighttime, mmHg                           | 100 ± 9                             | 99 ± 9                        | 102 ± 10               | 100 ± 7                             | 0.39        |
| Nocturnal dipping, %                      | 10.6 ± 5.5                          | 10.8 ± 6.1                    | 10.5 ± 6.2             | 13.6 ± 4.0                          | 0.17        |
| Non-dipper, n (%)                         | 51 (44%)                            | 10 (43%)                      | 11 (37%)               | 2 (13%)*                            | 0.046       |
| DBP                                       |                                     |                               |                        |                                     |             |
| Daytime, mmHg                             | 72 ± 6                              | 71 ± 7                        | 73 ± 5                 | 74 ± 6                              | 0.20        |
| Nighttime, mmHg                           | 59 ± 6                              | 58 ± 6                        | 59 ± 6                 | 60 ± 4                              | 0.88        |
| Nocturnal dipping, %                      | 17.3 ± 6.5                          | 18.6 ± 6.8                    | 18.5 ± 7.7             | 18.5 ± 5.9                          | 0.29        |

|                                            |            |            |            |            |        |
|--------------------------------------------|------------|------------|------------|------------|--------|
| Non-dipper, n (%)                          | 14 (12%)   | 2 (9%)     | 5 (17%)    | 0 (0%)     | 0.55   |
| <b>Follow-up ambulatory BP<sup>c</sup></b> |            |            |            |            |        |
| <b>SBP</b>                                 |            |            |            |            |        |
| Daytime, mmHg                              | 115 ± 9    | 113 ± 11   | 118 ± 9    | 124 ± 10*  | <0.001 |
| Nighttime, mmHg                            | 103 ± 8    | 102 ± 11   | 107 ± 10   | 110 ± 9*   | 0.002  |
| Nocturnal dipping, %                       | 9.7 ± 5.1  | 9.7 ± 5.9  | 9.8 ± 5.6  | 10.7 ± 7.1 | 0.54   |
| Non-dipper, n (%)                          | 83 (54%)   | 16 (57%)   | 22 (55%)   | 11 (58%)   | 0.74   |
| <b>DBP</b>                                 |            |            |            |            |        |
| Daytime, mmHg                              | 72 ± 6     | 72 ± 8     | 73 ± 6     | 77 ± 6*    | 0.015  |
| Nighttime, mmHg                            | 62 ± 6     | 61 ± 7     | 63 ± 7     | 65 ± 6     | 0.067  |
| Nocturnal dipping, %                       | 14.2 ± 6.7 | 15.4 ± 6.2 | 14.3 ± 7.4 | 14.7 ± 6.8 | 0.76   |
| Non-dipper, n (%)                          | 41 (27%)   | 4 (14%)    | 9 (23%)    | 5 (26%)    | 0.62   |

6 \*Significantly different from normal controls,  $p < 0.05$  from post-hoc pairwise comparison by Tukey's, Games-Howell for continuous variables, or  $p < 0.016$  from  
 7 Mann-Whitney U test or chi-square tests with Bonferroni correction for non-normally distributed continuous and categorical data, respectively.

8 #Data were presented with median and interquartile range.

9 <sup>b</sup>59 missing

10 <sup>c</sup>2 missing

11 SBP: systolic blood pressure; DBP: diastolic blood pressure; OSA: obstructive sleep apnea; OAH: obstructive apnoea hypopnea index

12
